# Biomarkers and Coronary Lesions Predict Outcomes after Revascularization in Non-ST-Elevation Acute Coronary Syndrome

Daniel Lindholm,<sup>1,2\*</sup> Stefan K. James,<sup>1,2</sup> Maria Bertilsson,<sup>2</sup> Richard C. Becker,<sup>3</sup> Christopher P. Cannon,<sup>4</sup> Evangelos Giannitsis,<sup>5</sup> Robert A. Harrington,<sup>6</sup> Anders Himmelmann,<sup>7</sup> Frederic Kontny,<sup>8</sup> Agneta Siegbahn,<sup>2,9</sup> Philippe Gabriel Steg,<sup>10,11,12,13</sup> Robert F. Storey,<sup>14</sup> Matthijs A. Velders,<sup>1,2</sup> W. Douglas Weaver,<sup>15</sup> and Lars Wallentin,<sup>1,2</sup> on behalf of the PLATO Investigators

**BACKGROUND:** Risk stratification in non-ST-elevation acute coronary syndrome (NSTEMI-ACS) is currently mainly based on clinical characteristics. With routine invasive management, angiography findings and biomarkers are available and may improve prognostication. We aimed to assess if adding biomarkers [high-sensitivity cardiac troponin T (cTnT-hs), N-terminal probrain-type natriuretic peptide (NT-proBNP), growth differentiation factor 15 (GDF-15)] and extent of coronary artery disease (CAD) might improve prognostication in revascularized patients with NSTEMI-ACS.

**METHODS:** In the PLATO (Platelet Inhibition and Patient Outcomes) trial, 5174 NSTEMI-ACS patients underwent initial angiography and revascularization and had cTnT-hs, NT-proBNP, and GDF-15 measured. Cox models were developed adding extent of CAD and biomarker levels to established clinical risk variables for the composite of cardiovascular death (CVD)/spontaneous myocardial infarction (MI), and CVD alone. Models were compared using  $c$ -statistic and net reclassification improvement (NRI).

**RESULTS:** For the composite end point and CVD, prognostication improved when adding extent of CAD, NT-proBNP, and GDF-15 to clinical variables ( $c$ -statistic

0.685 and 0.805, respectively, for full model vs 0.649 and 0.760 for clinical model). cTnT-hs did not contribute to prognostication. In the full model (clinical variables, extent of CAD, all biomarkers), hazard ratios (95% CI) per standard deviation increase were for cTnT-hs 0.93(0.81–1.05), NT-proBNP 1.32(1.13–1.53), GDF-15 1.20(1.07–1.36) for the composite end point, driven by prediction of CVD by NT-proBNP and GDF-15. For spontaneous MI, there was an association with NT-proBNP or GDF-15, but not with cTnT-hs.

**CONCLUSIONS:** In revascularized patients with NSTEMI-ACS, the extent of CAD and concentrations of NT-proBNP and GDF-15 independently improve prognostication of CVD/spontaneous MI and CVD alone. This information may be useful for selection of patients who might benefit from more intense and/or prolonged antithrombotic treatment.

ClinicalTrials.gov Identifier: NCT00391872

© 2016 American Association for Clinical Chemistry

Patients admitted with suspected or definite non-ST-elevation acute coronary syndrome (NSTEMI-ACS)<sup>16</sup> are heterogeneous in terms of risk of recurrent nonfatal and fatal events. Several risk scores have therefore been developed to

<sup>1</sup> Department of Medical Sciences, Cardiology, Uppsala University, Uppsala, Sweden;

<sup>2</sup> Uppsala Clinical Research Center, Uppsala University, Uppsala, Sweden; <sup>3</sup> Division of Cardiovascular Health and Disease, Heart, Lung and Vascular Institute, Academic Health Center, Cincinnati, OH; <sup>4</sup> Cardiovascular Division, Brigham and Women's Hospital and Harvard Clinical Research Institute, Boston, MA; <sup>5</sup> Department of Internal Medicine III, Cardiology, University Hospital Heidelberg, Germany; <sup>6</sup> Department of Medicine, Stanford University, Stanford, CA; <sup>7</sup> AstraZeneca Research and Development, Mölndal, Sweden; <sup>8</sup> Department of Cardiology, Stavanger University Hospital, Stavanger, Norway; <sup>9</sup> Department of Medical Sciences, Clinical Chemistry, Uppsala University, Uppsala, Sweden; <sup>10</sup> INSERM-Unité 1148, Paris, France; <sup>11</sup> Assistance Publique-Hôpitaux de Paris; Département Hospitalo-Universitaire FIRE, Hôpital Bichat, Paris, France; <sup>12</sup> Université Paris-Diderot, Sorbonne-Paris Cité, Paris, France; <sup>13</sup> NHLI Imperial College, ICMS, Royal Brompton Hospital, London, UK; <sup>14</sup> Department of Cardiovascular Science, University of Sheffield, Sheffield, UK; <sup>15</sup> Henry Ford Heart and Vascular Institute, Detroit, MI.

\* Address correspondence to this author at: Uppsala Clinical Research Center (UCR), Dag Hammarskjölds väg 14B, 1 tr, SE-752 37 Uppsala, Sweden. Fax +46-18-515570; e-mail daniel.lindholm@ucr.uu.se.

Received June 4, 2016; accepted August 23, 2016.

Previously published online at DOI: 10.1373/clinchem.2016.261271

© 2016 American Association for Clinical Chemistry

<sup>16</sup> Nonstandard abbreviations: NSTEMI-ACS, non-ST-elevation acute coronary syndrome; TIMI, Thrombolysis in Myocardial Infarction study group; GRACE, Global Registry of Acute Coronary Events; CK-MB, creatine kinase-MB; PCI, percutaneous coronary intervention; CAD, coronary artery disease; NT-proBNP, N-terminal probrain-type natriuretic peptide; GDF-15, growth differentiation factor 15; PLATO, Platelet Inhibition and Patient Outcomes trial; cTnT-hs, high-sensitivity cardiac troponin T; CVD, cardiovascular death; MI, myocardial infarction; CABG, coronary artery bypass graft; ECG, electrocardiogram; TIA, transient ischemic attack; IQR, interquartile range; UCR, Uppsala Clinical Research Center; 1VD, 1-vessel disease; 2VD, 2-vessel disease; 3VD, 3-vessel disease; LMD, left main disease; BMI, body mass index; HR, hazard ratio; LR, likelihood ratio; NRI, net reclassification improvement; 0/1VD, 0/1-vessel disease; STEMI, ST-elevation myocardial infarction; TRACER, Thrombin-Receptor Antagonist Vorapaxar in Acute Coronary Syndromes study.

estimate the prognosis and provide decision support regarding an early invasive or noninvasive management strategy (1–4). In this setting, the Thrombolysis in Myocardial Infarction study group (TIMI) (1) and Global Registry of Acute Coronary Events (GRACE) (2) scores are the most commonly used, and are based mainly on disease history and clinical characteristics available on admission. Regarding biomarkers, both of these risk scores include a dichotomous estimate of myocardial damage [creatinine kinase-MB (CK-MB) or troponin positive yes/no], and GRACE score also includes creatinine concentration as a crude estimate of renal function.

Since the development of the TIMI and GRACE scores, several aspects of NSTEMI-ACS treatment have evolved substantially. Based on more effective antithrombotic treatments, and improved outcomes with percutaneous coronary intervention (PCI), early angiography and subsequent revascularization has become the routine treatment in the majority of patients with NSTEMI-ACS and increased troponin concentrations in accordance with the current guidelines (4, 5). As revascularization substantially reduces the risk of subsequent events (6, 7), the tools developed before the invasive era might not be optimal for prognostication in the invasively managed population. In this setting, prognostication would rather be employed to guide secondary prevention measures, e.g., duration and intensity of antithrombotic treatment (8–11). At the same time, additional information will be available which might be useful for prognostication, e.g., severity of coronary artery disease (CAD) in the coronary angiogram and results of measurements on biomarkers from blood samples obtained on admission.

In patients with NSTEMI-ACS, the extent of CAD is associated with risk of subsequent events (12). During the last years several biomarkers have also been suggested to improve prognostication in patients with ACS, e.g., N-terminal probrain-type natriuretic peptide (NT-proBNP) (13, 14), growth differentiation factor 15 (GDF-15) (15), and cardiac troponins measured with high-sensitivity assays (14, 16, 17). Few studies have, however, assessed the complementary data provided by combining clinical information, angiography findings, and biomarker measurements. In this substudy of the Platelet Inhibition and Patient Outcomes (PLATO) trial, we therefore investigated if measurements of these new biomarkers and the angiographic information on extent of CAD might improve prognostication of different outcomes in patients with NSTEMI-ACS managed with early revascularization.

## Methods

### STUDY POPULATION

The PLATO trial (www.clinicaltrials.gov identifier: NCT00391872) randomized 18624 patients with ST-

elevation and non-ST-elevation acute coronary syndromes to ticagrelor or clopidogrel for the prevention of cardiovascular events. Patients were followed for up to 12 months and the primary end point was the composite of cardiovascular death (CVD), myocardial infarction (MI, excluding silent), and stroke. Details of study design, outcome definitions and overall results have been published (18, 19). A predefined biomarker substudy was also part of the PLATO program including the safety population (i.e., those who received at least one dose of the study drug) of 18421 patients. In the present study, 5174 patients in the biomarker substudy with available results of highly-sensitive cardiac troponin T (cTnT-hs), NT-proBNP, and GDF-15 at baseline; an admission diagnosis of NSTEMI-ACS; in-hospital management including coronary angiography and revascularization (by PCI or coronary artery bypass graft [CABG] surgery); and prespecified clinical characteristics were included (see Fig. S1 in the Data Supplement that accompanies the online version of this article at <http://www.clinchem.org/content/vol63/issue2>).

NSTEMI-ACS was defined by absence of both persistent ST-segment elevation and new (or presumed new) left bundle-branch block in entry ECG. Additionally, 2 or more of the following inclusion criteria were required: 1) ST-segment changes on electrocardiogram (ECG) indicating ischemia [ST-segment depression or transient elevation ( $\geq 1$  mm) in at least 2 contiguous leads]; 2) positive biomarker indicating myocardial necrosis (troponin I or T or CK-MB above the upper reference limit); 3) one of the following:  $\geq 60$  years of age, previous MI or CABG surgery, CAD with  $\geq 50\%$  stenosis in  $\geq 2$  vessels, previous ischemic stroke, transient ischemic attack (TIA), carotid stenosis, cerebral revascularization, diabetes mellitus, peripheral artery disease, or chronic renal dysfunction. The trial was conducted in accordance with the Declaration of Helsinki. All patients provided informed consent to participate.

### BIOMARKERS

Blood samples were taken by direct venipuncture at randomization at a median of 7.6 h after admission [interquartile range (IQR): 2.0–15.9]. This was at a median of 15.3 h (IQR: 8.3–21.1) after the start of symptoms. The samples were centrifuged within 30 min and aliquots of plasma (EDTA) were frozen and stored at  $-70^{\circ}\text{C}$  or lower until central analysis at the Uppsala Clinical Research Center (UCR) laboratory. GDF-15, cTnT-hs, and NT-proBNP were analyzed using the Cobas<sup>®</sup> Analytics e601 and c501 Immunoanalyzer (Roche Diagnostics).

According to the manufacturer, the cTnT-hs assay has an analytical measurement range of 3–10000 ng/L, limit of detection 5 ng/L, and limit of quantification of

13 ng/L, based on the 10% CV, with a local CV of 3% at 27 ng/L in the UCR laboratory.

The NT-proBNP assay has, according to the manufacturer, an analytical measurement range of 5–35 000 ng/L, a reported total CV ranging between 2.9 and 6.1%, and the lowest concentration corresponding to a 10% CV is 30 ng/L. The local CV was 3% at 125 ng/L.

The precommercial Elecsys® GDF-15 assay (Roche Diagnostics) has been described previously (20). According to the manufacturer, it has an interassay CV of 2.3% at 100 ng/L and 1.8% at 17 200 ng/L, an intraassay CV of 0.8% at 1100 ng/L and 0.9% at 18 600 ng/L, and a lower detection limit of 10 ng/L. In the UCR laboratory, the local CV was 3% at 928 ng/L.

All biomarkers were entered into the models as continuous variables, i.e., no specific cutoffs were used.

#### EXTENT OF CAD

At coronary angiography, the presence of a coronary stenosis of  $\geq 50\%$  was reported for the following locations: left main, left anterior descending, left circumflex, right coronary, and bypass graft. Information on whether the coronary anatomy was left or right dominant was not available in the database. For the purpose of this analysis, 1-vessel disease (1VD) was defined as a  $\geq 50\%$  stenosis in any of the above locations (except left main), 2-vessel disease (2VD) at 2 locations (except left main), and 3-vessel disease (3VD) as stenosis at  $\geq 3$  locations and/or in the left main [left main disease (LMD)].

#### END POINTS

The primary end point for this study was the composite of CVD and spontaneous MI. We also analyzed CVD and spontaneous MI individually. A central adjudication committee blinded to treatment assignment assessed all events.

#### STATISTICAL ANALYSES

Baseline and in-hospital characteristics are presented in the subgroup of patients with an in-hospital management that included revascularization and available biomarker and coronary angiography data, as well as data on pre-specified clinical characteristics for the clinical base model. Continuous variables are presented as median and Q1–Q3, categorical variables as number and percentage. To assess any association between biomarkers and extent of CAD,  $\chi^2$  tests (with biomarker quartiles) and Spearman correlations (with biomarkers as continuous variables) were conducted.

Kaplan–Meier estimated event rates were plotted by biomarker quartile as well as by extent of CAD for the primary end point of CVD or spontaneous MI. Multivariable Cox proportional hazards models were developed using clinical variables, extent of CAD, and continuous biomarker measurements as independent variables.

The clinical variables included in the models were: age; body mass index (BMI); heart rate; systolic blood pressure; male gender; habitual smoking; ST-depression in ECG; T-wave inversion in ECG; if patients had experienced hypertension, dyslipidemia, diabetes mellitus, chronic renal disease, or congestive heart failure before the index event; family history of coronary artery disease; and randomized treatment (ticagrelor or clopidogrel). Hazard ratios (HRs) and 95% CIs were expressed per SD increase in the respective log-transformed biomarker measurement. The assumption of proportional hazards for the biomarkers and extent of CAD was assessed visually using log-cumulative hazard plots. Model calibration was evaluated using the Grønnesby–Borgan test (20). The cumulative sums of Martingale-based residuals indicated that a log transformation was adequate for the biomarkers.

To assess the discriminatory ability of the models, the Harrell *c*-index was used. Models were compared in terms of global model fit improvement using likelihood ratio (LR) tests. The continuous net reclassification improvement (NRI) (21) was calculated to estimate the degree of correct reclassification when adding biomarkers and extent of CAD to the clinical base model, with each component presented individually (NRI among events, and NRI among non-events) and as a total measure. Censored observations were handled using Kaplan–Meier estimation. As a sensitivity analysis, we also entered mode of revascularization (PCI or CABG) as an interaction term in the models.

A 2-sided *P* value of 0.05 was used to denote statistical significance. No adjustments for multiple testing were performed and all analyses should be considered as exploratory. All analyses were conducted using SAS version 9.4.

#### Results

For this substudy, 5174 patients met the inclusion criteria of NSTEMI-ACS, had available angiography data, in-hospital revascularization, available biomarker measurements, and available data on clinical characteristics (see online Supplemental Fig. S1). The baseline and in-hospital characteristics are shown in Table 1. Compared to previously published data on the overall revascularized NSTEMI-ACS population from PLATO (22), there were no apparent differences in demographics, risk factors, or comorbidities. On the basis of angiography, 2051 (39.6%) patients had 0/1-vessel disease (0/1VD), 1529 patients (29.6%) had 2VD, and 1594 patients (30.8%) had 3VD/LMD.

Biomarker concentrations by quartile in relation to extent of CAD are shown in Fig. 1 and online Supplemental Table S1. There was no apparent association between concentrations of cTnT-hs and extent of CAD.

**Table 1. Baseline and in-hospital characteristics.**

|                                | Characteristic                                               | Total, n = 5174 <sup>a</sup> |
|--------------------------------|--------------------------------------------------------------|------------------------------|
| Demographics                   | Age, years, median (Q1–Q3)                                   | 63 (55–71)                   |
|                                | Female                                                       | 1296 (25.0%)                 |
|                                | Weight, kg, median (Q1–Q3)                                   | 80 (71–90)                   |
|                                | BMI, kg/m <sup>2</sup> , median (Q1–Q3)                      | 27.5 (24.9–30.7)             |
| Randomized treatment group     | Ticagrelor                                                   | 2603 (50.3%)                 |
|                                | Clopidogrel                                                  | 2571 (49.7%)                 |
| Risk factor                    | Habitual smoker                                              | 1758 (34.0%)                 |
|                                | Hypertension                                                 | 3381 (65.3%)                 |
|                                | Dyslipidemia                                                 | 2797 (54.1%)                 |
|                                | Diabetes mellitus                                            | 1351 (26.1%)                 |
|                                | Family history of CAD                                        | 1942 (37.5%)                 |
| Medical history                | Angina pectoris                                              | 2411 (46.6%)                 |
|                                | MI                                                           | 1107 (21.4%)                 |
|                                | Congestive heart failure                                     | 189 (3.7%)                   |
|                                | PCI                                                          | 908 (17.5%)                  |
|                                | CABG                                                         | 370 (7.2%)                   |
|                                | TIA                                                          | 157 (3.0%)                   |
|                                | Nonhemorrhagic stroke                                        | 173 (3.3%)                   |
|                                | Peripheral arterial disease                                  | 335 (6.5%)                   |
|                                | Chronic renal disease                                        | 196 (3.8%)                   |
|                                |                                                              |                              |
| Physical findings              | Diastolic blood pressure, mmHg, median (Q1–Q3)               | 80 (70–88)                   |
|                                | Systolic blood pressure, mmHg, median (Q1–Q3)                | 135 (120–150)                |
|                                | Heart rate beats per min, median (Q1–Q3)                     | 71 (63–80)                   |
| ECG findings                   | ST-segment depression ≥1 mm                                  | 2825 (54.6%)                 |
|                                | T-wave inversion in ECG                                      | 1690 (32.7%)                 |
| Delays                         | Delay from start of pain to randomization, h, median (Q1–Q3) | 15.3 (8.3–21.1)              |
|                                | Delay from admission to randomization, h, median (Q1–Q3)     | 7.6 (2.0–15.9)               |
| Medications at randomization   | Aspirin                                                      | 4916 (95.0%)                 |
|                                | Beta-blockade                                                | 4173 (80.7%)                 |
|                                | ACE <sup>a</sup> -inhibition and/or ARB <sup>b</sup>         | 3276 (63.3%)                 |
|                                | Cholesterol lowering (statin)                                | 4271 (82.5%)                 |
|                                | Calcium antagonist                                           | 813 (15.7%)                  |
|                                | Diuretic                                                     | 1039 (20.1%)                 |
| Invasive procedures inhospital | Coronary angiography                                         | 5174 (100.0%)                |
|                                | PCI before discharge for index event                         | 4537 (87.7%)                 |
|                                | CABG predischARGE                                            | 661 (12.8%)                  |

<sup>a</sup> Data are n (%) unless otherwise noted.<sup>b</sup> ACE, angiotensin converting enzyme; ARB, angiotensin receptor blocker.

For both NT-proBNP and GDF-15, quartile-divided biomarker concentrations were significantly related to extent of CAD ( $P < 0.0001$  for both). However, the correlations with extent of CAD were weak, with Spearman correlation coefficients of  $r = 0.117$  and  $r = 0.121$  for NT-proBNP and GDF-15, respectively.

Kaplan–Meier estimates of the composite end point of CVD and spontaneous MI are found in Fig. 2A–C. Both NT-proBNP and GDF-15 were associated with the composite end point driven by strong prediction of CVD, with HR 8.00 (95% CI, 3.99–16.03) and 7.61 (95% CI, 3.64–15.93) when comparing the highest to

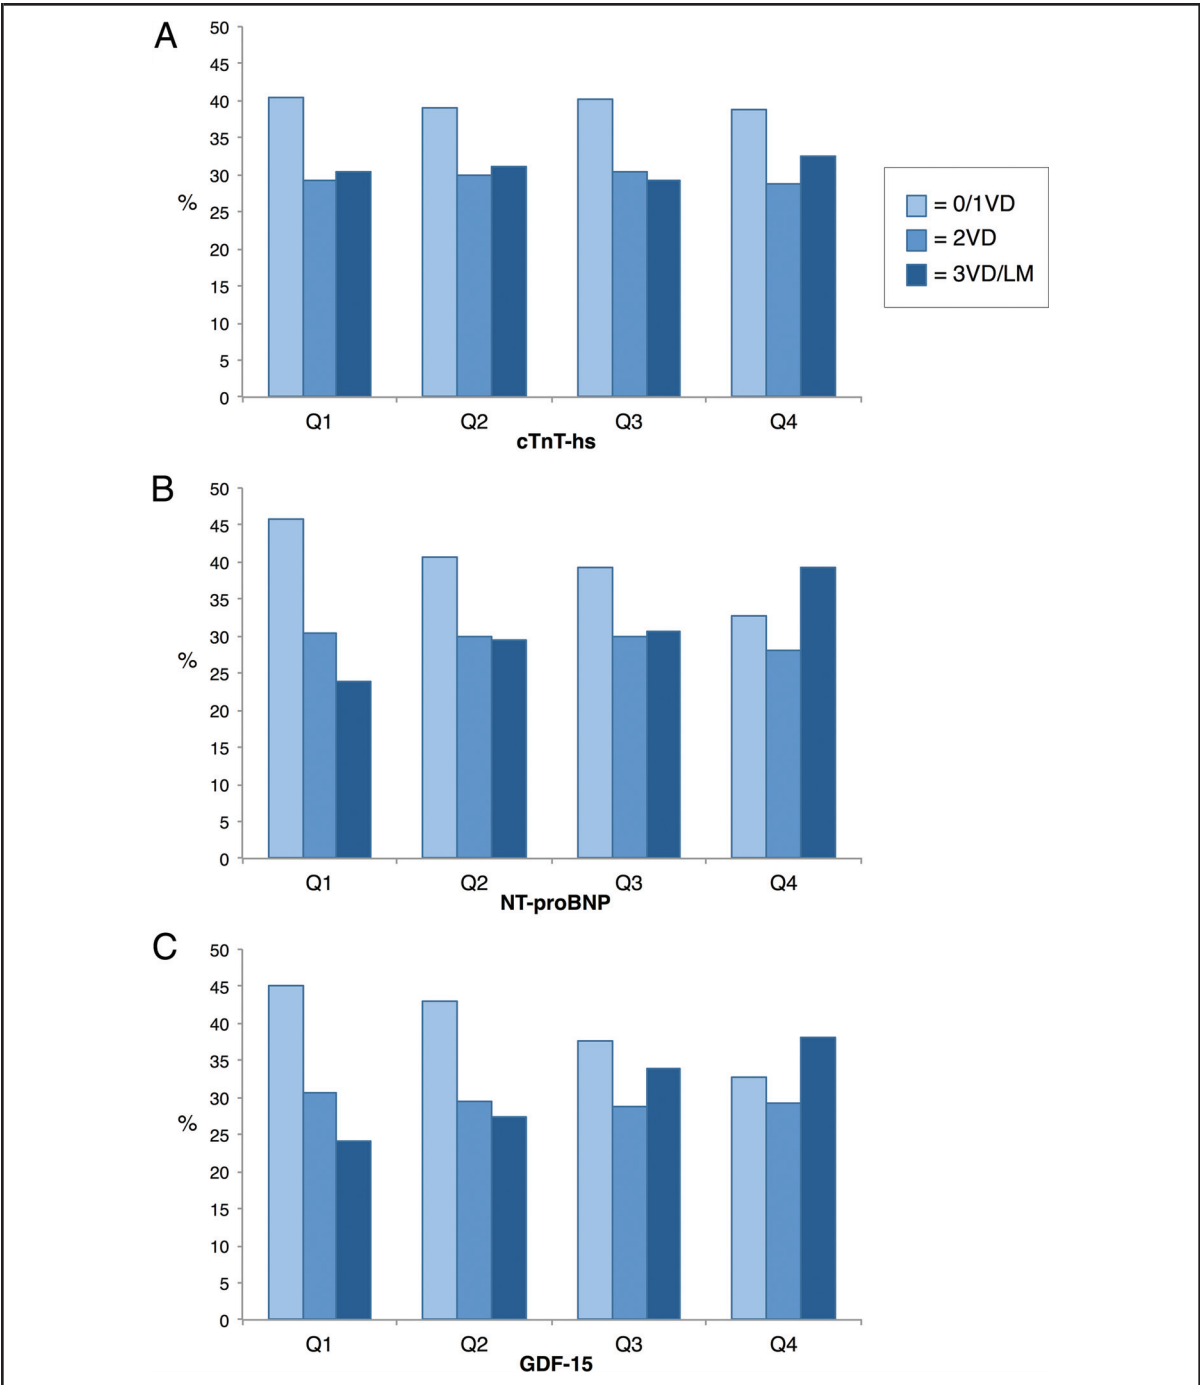

**Fig. 1. Extent of CAD per biomarker quartiles.** Proportion of patients with 0/1VD, 2VD, and 3VD/LM in each quartile of (A) cTnT-hs, (B) NT-proBNP, and (C) GDF-15.  $\chi^2$  Tests were performed to assess if there were relationships between the extent of CAD and biomarkers by quartile: cTnT-hs ( $P = 0.68$ ), NT-proBNP ( $P < 0.0001$ ), and GDF-15 ( $P < 0.0001$ ).



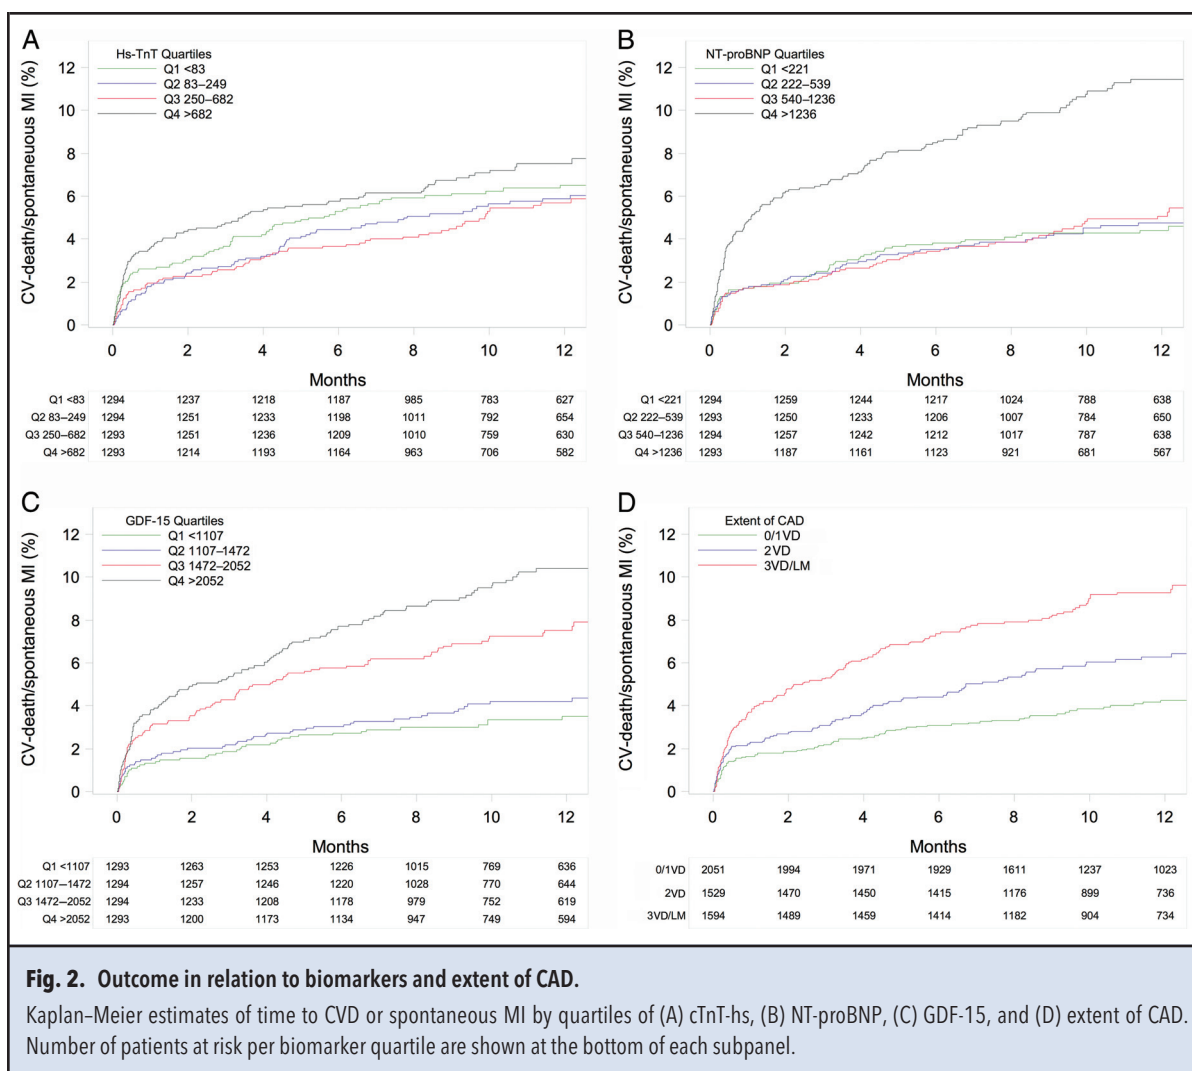

the lowest quartile of NT-proBNP and GDF-15, respectively. The highest compared to the lowest quartile of NT-proBNP was also associated with a higher risk of spontaneous MI, unadjusted HR 1.77 (95% CI, 1.24–2.53). For GDF-15 there was a gradual association of higher rates of spontaneous MI with higher concentrations of GDF-15. Thus, the third and the highest quartile compared to the lowest quartile of GDF-15 had unadjusted HRs 1.91 (95% CI, 1.28–2.87) and 2.19 (1.47–3.25), respectively (Table 2, Fig. 2B–C). There was no apparent association between concentrations of cTnT-hs and the composite end point of CVD and spontaneous MI, or with spontaneous MI alone. For CVD alone, the highest compared to the lowest quartile of cTnT-hs was associated with worse outcome, unadjusted HR 1.75 (95% CI, 1.09–2.81) (Table 2).

The extent of CAD was associated with the primary composite end point, with an unadjusted HR

1.46 (95% CI, 1.08–1.97) for 2VD and a HR 1.97 (95% CI, 1.48–2.60) for 3VD/left main disease, when compared with 0/1VD. This was driven by corresponding associations with both CVD and MI. (Table 2, Fig. 2D).

#### MULTIVARIABLE EVALUATION OF PROGNOSTIC VALUE OF CAD AND BIOMARKERS

Concerning the composite end point of CVD and spontaneous MI, adding extent of CAD to clinical variables improved the model with a *c* index increasing from 0.649 to 0.673 (LR-test:  $P < 0.0001$ ). Further adding either NT-proBNP or GDF-15 improved the model's performance to a similar degree, with a *c* index of 0.679 and 0.683, respectively (both  $P < 0.0001$ ). NT-proBNP contributed mainly by reclassifying patients to a higher risk, whereas GDF-15 contributed mainly by reclassifying patients to a lower risk (Table 3). cTnT-hs did

**Table 2.** Occurrence of endpoints according to extent of CAD and biomarker quartiles (unadjusted).

|                  | No. of patients | Cardiovascular death or spontaneous MI |                  | Cardiovascular death |                   | Spontaneous MI |                  |
|------------------|-----------------|----------------------------------------|------------------|----------------------|-------------------|----------------|------------------|
|                  |                 | Events, n (%)                          | HR (95% CI)      | Events, n (%)        | HR (95% CI)       | Events, n (%)  | HR (95% CI)      |
| Extent of CAD    |                 |                                        |                  |                      |                   |                |                  |
| 0VD/1VD          | 2051            | 80 (3.9)                               | Reference        | 21 (1.0)             | Reference         | 64 (3.1)       | Reference        |
| 2VD              | 1529            | 90 (5.9)                               | 1.46 (1.08–1.97) | 29 (1.9)             | 1.75 (1.00–3.07)  | 67 (4.4)       | 1.37 (0.97–1.93) |
| 3VD/LMD          | 1594            | 140 (8.8)                              | 1.97 (1.48–2.60) | 64 (4.0)             | 3.02 (1.82–5.00)  | 91 (5.7)       | 1.68 (1.21–2.33) |
| cTnT-hs (ng/L)   |                 |                                        |                  |                      |                   |                |                  |
| Q1: <83          | 1294            | 80 (6.2)                               | Reference        | 27 (2.1)             | Reference         | 58 (4.5)       | Reference        |
| Q2: 83–249       | 1294            | 72 (5.6)                               | 0.88 (0.64–1.21) | 23 (1.8)             | 0.84 (0.48–1.47)  | 57 (4.4)       | 0.96 (0.67–1.39) |
| Q3: 250–682      | 1293            | 67 (5.2)                               | 0.83 (0.60–1.15) | 18 (1.4)             | 0.66 (0.37–1.21)  | 52 (4.0)       | 0.89 (0.61–1.29) |
| Q4: >682         | 1293            | 91 (7.0)                               | 1.16 (0.86–1.57) | 46 (3.6)             | 1.75 (1.09–2.81)  | 55 (4.3)       | 0.97 (0.67–1.40) |
| NT-proBNP (ng/L) |                 |                                        |                  |                      |                   |                |                  |
| Q1: <221         | 1294            | 56 (4.3)                               | Reference        | 9 (0.7)              | Reference         | 48 (3.7)       | Reference        |
| Q2: 221–539      | 1293            | 57 (4.4)                               | 1.03 (0.71–1.49) | 17 (1.3)             | 1.92 (0.86–4.30)  | 45 (3.5)       | 0.95 (0.63–1.43) |
| Q3: 540–1236     | 1294            | 62 (4.8)                               | 1.11 (0.77–1.60) | 19 (1.5)             | 2.13 (0.96–4.70)  | 49 (3.8)       | 1.02 (0.69–1.53) |
| Q4: >1236        | 1293            | 135 (10.4)                             | 2.55 (1.87–3.48) | 69 (5.3)             | 8.00 (3.99–16.03) | 80 (6.2)       | 1.77 (1.24–2.53) |
| GDF-15 (ng/L)    |                 |                                        |                  |                      |                   |                |                  |
| Q1: <1107        | 1293            | 42 (3.2)                               | Reference        | 8 (0.6)              | Reference         | 36 (2.8)       | Reference        |
| Q2: 1107–1472    | 1294            | 52 (4.0)                               | 1.23 (0.82–1.85) | 15 (1.2)             | 1.87 (0.79–4.40)  | 44 (3.4)       | 1.22 (0.78–1.89) |
| Q3: 1472–2052    | 1294            | 93 (7.2)                               | 2.27 (1.58–3.27) | 32 (2.5)             | 4.06 (1.87–8.81)  | 67 (5.2)       | 1.91 (1.28–2.87) |
| Q4: >2052        | 1293            | 123 (9.5)                              | 3.07 (2.16–4.36) | 59 (4.6)             | 7.61 (3.64–15.93) | 75 (5.8)       | 2.19 (1.47–3.25) |

not improve prediction of the composite end point (Fig. 3; also see online Supplemental Table S2). In a model comprising clinical variables, extent of CAD, and NT-proBNP, the addition of GDF-15 further improved the model to  $c$  index 0.685 ( $P = 0.0026$ ) (Table 3). In the full model (including clinical variables, extent of CAD, and all biomarkers), the HRs (95% CIs) per SD increase in biomarker concentration were cTnT-hs 0.93 (0.81–1.05), NT-proBNP 1.32 (1.13–1.53), and GDF-15 1.20 (1.07–1.36) for the prediction of the composite end point of CVD or spontaneous MI (Fig. 3).

Regarding the prediction of CVD alone, adding extent of CAD to clinical variables improved the model, with the  $c$  index rising from 0.760 to 0.791 ( $P < 0.0001$ ) (Table 3). The addition of cTnT-hs to clinical variables improved the model minimally, with an increase in  $c$  index from 0.760–0.762 (see online Supplemental Table S2), while the addition of NT-proBNP or GDF-15 increased the  $c$  index to 0.776 and 0.772, respectively (both  $P < 0.0001$ ). In a model including clinical variables and extent of CAD, adding NT-proBNP or GDF-15 increased the  $c$  index to 0.799 or 0.804, respectively (both  $P < 0.0001$ ). In a model comprising clinical

variables, extent of CAD, and NT-proBNP, adding GDF-15 further improved the model to  $c$  index 0.805 ( $P = 0.0062$ ). In the final model, the HRs (95% CIs) per SD increase in biomarker concentration were cTnT-hs 1.00 (0.80–1.23), NT-proBNP 1.61 (1.24–2.08), and GDF-15 1.31 (1.09–1.58) for the prediction of CVD (Fig. 3).

For spontaneous MI alone, NT-proBNP and GDF-15 were associated with the outcome in a model adjusting for clinical variables and extent of CAD. No association was apparent between concentrations of cTnT-hs and spontaneous MI. In a model adjusting for clinical variables and extent of CAD, the HRs (95% CIs) per SD increase in biomarker concentration were cTnT-hs 0.89 (0.76–1.04), NT-proBNP 1.28 (1.07–1.53), and GDF-15 1.10 (0.95–1.28) for the prediction of spontaneous MI.

Similar results were found when assessing the prognostic impact per biomarker doubling instead of per SD increase (see online Supplemental Fig. S2). There were no significant interactions between the prognostic performance of the biomarkers and mode of revascularization (PCI vs CABG, data not shown).

**Table 3. Model improvement by adding extent of CAD and biomarkers to clinical characteristics.**

| Outcome                                                         | Model                                | Predictor added | Harrell <i>c</i> (95% CI)     |                            | NRI   |              |                 | LR test |  |
|-----------------------------------------------------------------|--------------------------------------|-----------------|-------------------------------|----------------------------|-------|--------------|-----------------|---------|--|
|                                                                 |                                      |                 | Model without predictor added | Model with predictor added | Total | Among events | Among nonevents | P value |  |
| Cardiovascular death or Spontaneous MI (number of events = 309) | Clinical                             | Extent of CAD   | 0.649 (0.617–0.681)           | 0.673 (0.642–0.704)        | 0.233 | 0.238        | –0.005          | <0.0001 |  |
|                                                                 | Clinical                             | NT-proBNP       | 0.649 (0.617–0.681)           | 0.661 (0.629–0.693)        | 0.253 | 0.188        | 0.065           | <0.0001 |  |
|                                                                 | Clinical                             | GDF-15          | 0.649 (0.617–0.681)           | 0.662 (0.630–0.694)        | 0.205 | 0.011        | 0.194           | <0.0001 |  |
|                                                                 | Clinical + extent of CAD             | NT-proBNP       | 0.673 (0.642–0.704)           | 0.679 (0.647–0.711)        | 0.170 | 0.124        | 0.046           | <0.0001 |  |
|                                                                 | Clinical + extent of CAD             | GDF-15          | 0.673 (0.642–0.704)           | 0.683 (0.652–0.714)        | 0.191 | 0.006        | 0.185           | <0.0001 |  |
|                                                                 | Clinical + extent of CAD + NT-proBNP | GDF-15          | 0.679 (0.647–0.711)           | 0.685 (0.653–0.716)        | 0.101 | –0.010       | 0.111           | 0.0026  |  |
| Cardiovascular death (number of events = 113)                   | Clinical                             | Extent of CAD   | 0.760 (0.713–0.806)           | 0.791 (0.749–0.833)        | 0.428 | 0.241        | 0.186           | <0.0001 |  |
|                                                                 | Clinical                             | NT-proBNP       | 0.760 (0.713–0.806)           | 0.776 (0.730–0.823)        | 0.428 | 0.256        | 0.172           | <0.0001 |  |
|                                                                 | Clinical                             | GDF-15          | 0.760 (0.713–0.806)           | 0.772 (0.727–0.817)        | 0.273 | 0.038        | 0.235           | <0.0001 |  |
|                                                                 | Clinical + extent of CAD             | NT-proBNP       | 0.791 (0.749–0.833)           | 0.799 (0.755–0.842)        | 0.355 | 0.215        | 0.140           | <0.0001 |  |
|                                                                 | Clinical + extent of CAD             | GDF-15          | 0.791 (0.749–0.833)           | 0.804 (0.764–0.844)        | 0.234 | 0.003        | 0.230           | <0.0001 |  |
|                                                                 | Clinical + extent of CAD + NT-proBNP | GDF-15          | 0.799 (0.755–0.842)           | 0.805 (0.763–0.846)        | 0.107 | 0.028        | 0.079           | 0.0057  |  |
| Spontaneous MI (number of events = 222)                         | Clinical                             | Extent of CAD   | 0.629 (0.592–0.667)           | 0.645 (0.609–0.681)        | 0.149 | 0.251        | –0.102          | 0.0072  |  |
|                                                                 | Clinical                             | NT-proBNP       | 0.629 (0.592–0.667)           | 0.636 (0.598–0.673)        | 0.169 | 0.141        | 0.029           | 0.0013  |  |
|                                                                 | Clinical                             | GDF-15          | 0.629 (0.592–0.667)           | 0.635 (0.598–0.672)        | 0.119 | –0.036       | 0.155           | 0.0203  |  |
|                                                                 | Clinical + extent of CAD             | NT-proBNP       | 0.645 (0.609–0.681)           | 0.649 (0.612–0.686)        | 0.162 | 0.144        | 0.017           | 0.0037  |  |
|                                                                 | Clinical + extent of CAD             | GDF-15          | 0.645 (0.609–0.681)           | 0.650 (0.614–0.686)        | 0.128 | –0.017       | 0.145           | 0.0298  |  |
|                                                                 | Clinical + extent of CAD + NT-proBNP | GDF-15          | 0.649 (0.612–0.686)           | 0.652 (0.615–0.688)        | 0.055 | –0.035       | 0.090           | 0.1722  |  |



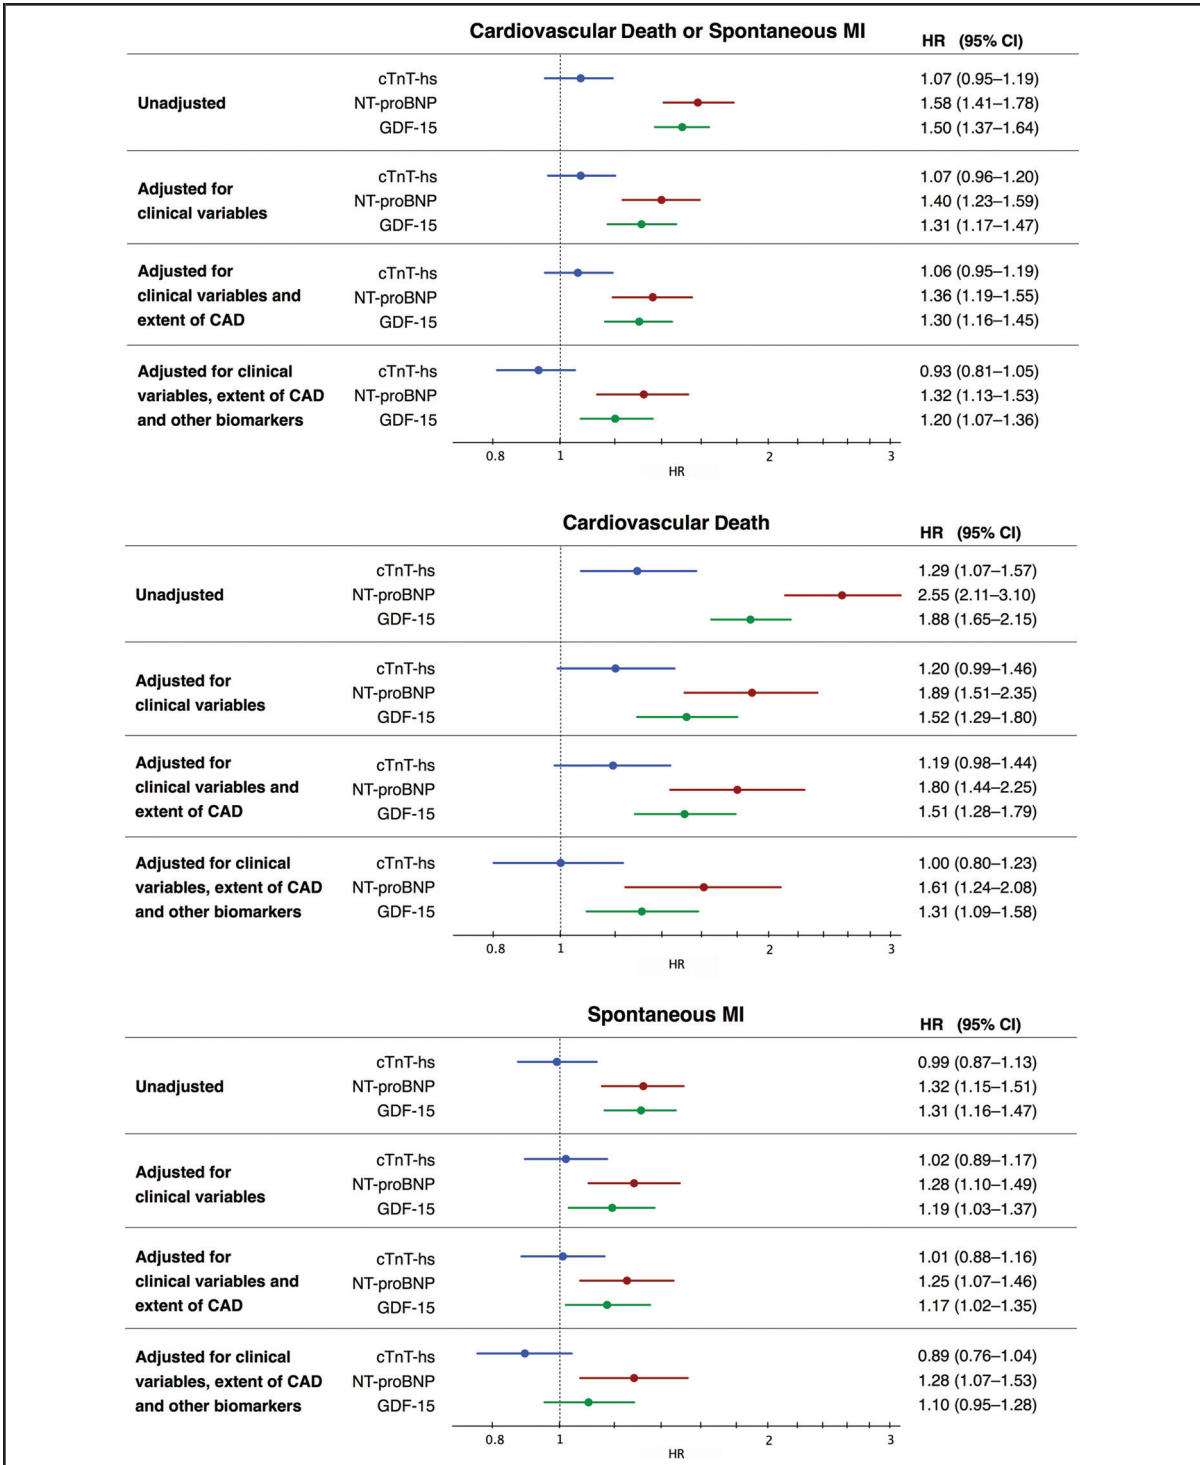

**Fig. 3.** Adding biomarkers to risk prediction models. HRs per SD increase in biomarker concentration in different Cox proportional hazards models. The unadjusted model includes no other variable than randomized treatment. The clinical variables included were age; BMI; heart rate; systolic blood pressure; male sex; habitual smoking; ST-depression in ECG; T-wave inversion in ECG; history of hypertension, dyslipidemia, diabetes mellitus, chronic renal disease, congestive heart failure; family history of coronary artery disease; and randomized treatment (ticagrelor or clopidogrel).

## Discussion

Early coronary angiography and, if feasible, revascularization is currently the routine treatment in patients with NSTEMI-ACS with increased troponin concentrations without further risk stratification. There is a need for better information on the risk for different events after the invasive procedure as support for the decision making on continuing medical treatments, e.g., intensity and duration of antithrombotic treatment (8–11). In this PLATO substudy focusing on patients with NSTEMI-ACS managed with early revascularization, we showed that the extent of CAD at coronary angiography and the entry concentrations of NT-proBNP and GDF-15 independently improved the prediction of CVD alone and CVD or spontaneous MI. The models combining clinical characteristics, extent of CAD, and biomarkers outperformed a model based on clinical characteristics alone. NT-proBNP, GDF-15, and the extent of CAD all independently contributed to the prognostication of both CVD and spontaneous MI. In contrast, cTnT-hs concentrations at the time of presentation were not independently associated with either the composite end point of CVD and spontaneous MI, or its individual components (when adjusting for clinical variables) in NSTEMI-ACS patients managed with revascularization.

An association between angiographic extent of CAD and subsequent events has previously been shown for ACS overall (23), NSTEMI-ACS (12), and ST-elevation myocardial infarction (STEMI) (24). The conventional risk scores, e.g., TIMI and GRACE scores, were developed for identification of patients at high risk at entry who might benefit from early revascularization. However, these scores may be less appropriate for risk prediction in the invasively managed NSTEMI-ACS population. The present findings of an independent prognostic value of extent of CAD is in agreement with the ACUITY-PCI score which, including angiographic findings (extent of CAD, small vessel disease, bifurcation lesion) and clinical variables (baseline cardiac biomarker elevation or ST-deviation, insulin-treated diabetes, renal insufficiency), performed better than both TIMI and GRACE scores, with *c* indices of 0.70 vs 0.56 and 0.51, respectively, for the prediction of 1-year mortality or MI in NSTEMI-ACS patients undergoing PCI (25).

In previous studies of heterogeneous patient cohorts with NSTEMI-ACS, troponin levels have generally been associated with subsequent ischemic events and mortality (26–28). However, these studies reflect the variable revascularization practices from when they were conducted, including patients who, despite increased troponin concentrations and higher risk of subsequent events, still were managed with a noninvasive management strategy. We have previously reported the finding of a strong association between cTnT-hs and the com-

posite end point of CVD/MI/stroke in the nonrevascularized NSTEMI-ACS cohort in PLATO, in contrast to a lack of association in the present revascularized cohort (6). These contrasting findings are most likely due to the substantial risk reduction of early thrombotic events caused by the stenting of the culprit lesion in the revascularized patients. In GUSTO (global utilization of strategies to open occluded arteries)-IV, patients with increased troponin concentrations who underwent revascularization had almost identical risk of death as patients with nonincreased troponin concentrations (29). Similar findings have recently been reported from the contemporary thrombin-receptor antagonist vorapaxar in acute coronary syndromes (TRACER) study, where peak troponin concentrations were associated with mortality only in patients who did not undergo revascularization, while in revascularized patients, peak troponin concentrations failed to predict 2-year mortality (30).

NT-proBNP is a well-established risk marker that predicts mortality in several different settings: ACS (31, 32), heart failure (33), and even atrial fibrillation (34). Similarly, GDF-15 has also demonstrated prognostic value in patients with heart failure (35), atrial fibrillation (36), and in the general population (37, 38). Additionally, GDF-15 has been shown to predict mortality in NSTEMI-ACS, with added prognostic value when combined with NT-proBNP (15, 39). In a recent study, the addition of NT-proBNP and GDF-15 to the GRACE score improved the prediction of all-cause mortality or MI at 6 months in NSTEMI-ACS patients (40). In the present study focusing only on invasively managed NSTEMI-ACS patients, we showed for the first time the independent prognostic value of extent of CAD as well as the biomarkers NT-proBNP and GDF-15. GDF-15 was shown to contribute to risk prediction to a similar extent as NT-proBNP. However, while NT-proBNP improved identification of patients at higher risk, GDF-15 contributed mainly by reclassifying patients to a lower risk level. The reason for this is unknown, but could be related to the fact that primarily the top quartile of NT-proBNP identified patients at increased risk, whereas GDF-15 provided a more gradual increase in risk by increasing quartiles.

The current European NSTEMI-ACS guidelines recommend only troponin in the assessment of a patient with NSTEMI-ACS, mainly to establish the diagnosis; and risk scores (either TIMI or GRACE) for risk assessment (5). In the present study of invasively managed NSTEMI-ACS patients, we show that extent of CAD, NT-proBNP, and GDF-15, but not cTnT-hs, add substantial prognostic information when compared with clinical characteristics alone. As current clinical practice may shift toward longer term antiplatelet therapy and/or anticoagulant use based on recent studies (8–11, 36), the complementary information from angiographic burden

of CAD and biomarkers could help us better understand which patients benefit the most from more intense and/or prolonged treatment.

There are limitations to this study. First, it was a post hoc analysis of the revascularized NSTEMI-ACS subgroup. The analyses were based on patients who underwent coronary angiography and revascularization based on a decision by the treating physician as in the real life setting. This decision was no doubt influenced by troponin levels measured locally. Therefore, increased troponin concentrations likely influenced the selection of the presently studied subgroup, although the concentration at entry was not significantly related to outcomes in the revascularized population. Finally, in this study only biomarker measurements at the time of randomization were studied. The possible added prognostic information of serial measurements of biomarkers is acknowledged.

In conclusion, in this PLATO substudy, the extent of CAD at coronary angiography and entry concentrations of NT-proBNP and GDF-15 independently improved the prediction of subsequent CVD or spontaneous MI beyond clinical characteristics in patients with NSTEMI-ACS managed with early revascularization. The extent of CAD and the concentrations of NT-proBNP and GDF-15 all independently contributed to prognostication of both CVD and spontaneous MI. In contrast, the cTnT-hs concentration at entry was not associated with the composite of CVD and spontaneous MI or spontaneous MI alone after early revascularization. This information therefore might be useful to include in decision algorithms for selection of NSTEMI-ACS patients who might benefit from more intense and/or prolonged antithrombotic treatment, or for identification of patients who might do well with less intense treatment after revascularization.

**Author Contributions:** All authors confirmed they have contributed to the intellectual content of this paper and have met the following 3 requirements: (a) significant contributions to the conception and design, acquisition of data, or analysis and interpretation of data; (b) drafting or revising the article for intellectual content; and (c) final approval of the published article.

**Authors' Disclosures or Potential Conflicts of Interest:** Upon manuscript submission, all authors completed the author disclosure form. Disclosures and/or potential conflicts of interest:

**Employment or Leadership:** A. Himmelmann, AstraZeneca.

**Consultant or Advisory Role:** S. James, AstraZeneca, Daiichi Sankyo, Janssen, Medtronic, and Sanofi. S. James, The Medicines Company; R.C. Becker, AstraZeneca, Bayer, Janssen, Regado Biosciences, and Portola; C.P. Cannon, Alnylam, Arisaph, BI, BILilly, Bristol-Myers

Squibb, GSK, Kowa, Merck, Takeda, Lipimedix, Pfizer, Regeneron, and Sanofi; E. Giannitsis, Roche Diagnostics; R.A. Harrington, Apo Pharma, Medtronic, Johnson & Johnson, Orexigen, Amgen, Gilead Sciences, Merck, MyoKardia, The Medicines Company, Vida Health, and WebMD; F. Kontny, AstraZeneca; P.G. Steg, Amarin, Bayer/Janssen, Daiichi Sankyo/Lilly, BMS/Pfizer, GSK, Sanofi/Regeneron, The Medicines Company, Novartis, Boehringer Ingelheim, CSL-Behring, and AstraZeneca; R.F. Storey, AstraZeneca, Accumetrics, Aspen, Correvio, Daiichi Sankyo/Eli Lilly, Merck, Roche, The Medicines Company, Regeneron, PlaqueTec, ThermoFisher Scientific, and Sanofi-Aventis; L.C. Wallentin, Abbott, Boehringer Ingelheim, AstraZeneca, GlaxoSmithKline, and Bristol-Myers Squibb/Pfizer.

**Stock Ownership:** A. Himmelmann, AstraZeneca; P.G. Steg, Aterovax.

**Honoraria:** D. Lindholm, AstraZeneca; E. Giannitsis, AstraZeneca, Bayer Vital, and Roche Diagnostics; F. Kontny, AstraZeneca; P.G. Steg, AstraZeneca; R.F. Storey, AstraZeneca, Medscape, Daiichi Sankyo/Eli Lilly, and Accumetrics; L.C. Wallentin, AstraZeneca, Boehringer Ingelheim, Bristol-Myers Squibb/Pfizer, and GlaxoSmithKline.

**Research Funding:** The PLATO study was funded by AstraZeneca. Support for the analysis and interpretation of results and preparation of the manuscript was provided through funds to the Uppsala Clinical Research Center and Duke Clinical Research Institute as part of the Clinical Study Agreement. Roche Diagnostics supported the research by providing the pre-commercial assay of GDF-15 free of charge. D. Lindholm, AstraZeneca to institution; S. James, AstraZeneca, Terumo Inc., Medtronic, and Vascular Solutions to institutions; M. Bertilsson, AstraZeneca to institution; R.C. Becker, AstraZeneca; C.P. Cannon, AstraZeneca, Takeda, Boehringer Ingelheim, Merck, GlaxoSmithKline, Arisaph, and Janssen; R.A. Harrington, AstraZeneca, Bristol-Myers Squibb, CSL, GlaxoSmithKline, Johnson & Johnson, Merck, NHLBI, Portola, Regado, Sanofi-Aventis, Novartis, and The Medicines Company to institutions; A. Siegbahn, AstraZeneca, Boehringer Ingelheim, and Bristol-Myers Squibb to institutions; P.G. Steg, Sanofi and Servier; R.F. Storey, AstraZeneca, Daiichi Sankyo/Eli Lilly, and Merck to institutions; M.A. Velders, AstraZeneca to institutions; L.C. Wallentin, AstraZeneca, Merck & Co, Boehringer Ingelheim, Bristol-Myers Squibb/Pfizer, GlaxoSmithKline, and Roche to institutions.

**Expert Testimony:** None declared.

**Patents:** R.F. Storey, named by AstraZeneca as an inventor on a patent pending related to discoveries made during the PEGASUS-TIMI 54 study but has no personal financial interest in this; L.C. Wallentin, holds two patents involving GDF-15.

**Other Remuneration:** R.C. Becker, AstraZeneca; C.P. Cannon, travel support from AstraZeneca, Takeda, Boehringer Ingelheim, Merck, personal fees from Accumetrics, Essentialis, CSL Behring, Kowa, and Lipimedix, personal fees and travel support from Regeneron and Sanofi; P.G. Steg, personal fees and non-financial support from AstraZeneca, personal fees from Sanofi and Servier, personal fees from Amarin, Bayer, Boehringer Ingelheim, Bristol-Myers Squibb, Daiichi-Sankyo, Eli Lilly, Merck Sharpe & Dohme, Novartis, Pfizer, Medtronic, The Medicines Company, CSL-Behring, Janssen, and GlaxoSmithKline; R.F. Storey, travel support from AstraZeneca and Medtronic, consumables from Accumetrics.

**Role of Sponsor:** The funding organizations played a direct role in the design of study, choice of enrolled patients, review and interpretation of data, and final approval of manuscript.

**Acknowledgments:** We thank Ebba Bergman, PhD, at Uppsala Clinical Research Center, who provided editorial assistance.

## References

1. Antman EM, Cohen M, Bernink PJ, McCabe CH, Horacek T, Papuchis G, et al. The TIMI risk score for unstable angina/non-ST elevation MI: A method for prognostication and therapeutic decision making. *JAMA* 2000;284:835-42.
2. Eagle KA, Lim MJ, Dabbous OH, Pieper KS, Goldberg RJ, Van de Werf F, et al. A validated prediction model for all forms of acute coronary syndrome: estimating the risk of 6-month postdischarge death in an international

- registry. *JAMA* 2004;291:2727–33.
3. Lagerqvist B, Diderholm E, Lindahl B, Husted S, Kontny F, Ståhle E, et al. FRISC score for selection of patients for an early invasive treatment strategy in unstable coronary artery disease. *Heart* 2005;91:1047–52.
4. Fox KAA, Clayton TC, Damman P, Pocock SJ, de Winter RJ, Tijssen JGP, et al. Long-term outcome of a routine versus selective invasive strategy in patients with non-ST-segment elevation acute coronary syndrome: a meta-analysis of individual patient data. *J Am Coll Cardiol* 2010;55:2435–45.
5. Hamm CW, Bassand JP, Agewall S, Bax J, Boersma E, Bueno H, et al. ESC Guidelines for the management of acute coronary syndromes in patients presenting without persistent ST-segment elevation: the Task Force for the management of acute coronary syndromes (ACS) in patients presenting without persistent ST-segment elevation of the European Society of Cardiology (ESC). *Eur Heart J* 2011;32:2999–3054.
6. Wallentin L, Lindholm D, Siegbahn A, Wernroth L, Becker RC, Cannon CP, et al. Biomarkers in relation to the effects of ticagrelor in comparison with clopidogrel in non-ST-elevation acute coronary syndrome patients managed with or without in-hospital revascularization: a substudy from the Prospective Randomized Platelet Inhibition and Patient Outcomes (PLATO) trial. *Circulation* 2014;129:293–303.
7. Chan MY, Mahaffey KW, Sun LJ, Pieper KS, White HD, Aylward PE, et al. Prevalence, predictors, and impact of conservative medical management for patients with non-ST-segment elevation acute coronary syndromes who have angiographically documented significant coronary disease. *JACC Cardiovasc Interv* 2008;1:369–78.
8. Mauri L, Kereiakes DJ, Yeh RW, Driscoll-Shempp P, Cutlip DE, Steg PG, et al. Twelve or 30 Months of dual antiplatelet therapy after drug-eluting stents. *N Engl J Med* 2014;371:2155–66.
9. Tricoci P, Huang Z, Held C, Moliterno DJ, Armstrong PW, Van de Werf F, et al. Thrombin-receptor antagonist vorapaxar in acute coronary syndromes. *N Engl J Med* 2012;366:20–33.
10. Morrow DA, Braunwald E, Bonaca MP, Ameriso SF, Dalby AJ, Fish MP, et al. Vorapaxar in the secondary prevention of atherothrombotic events. *N Engl J Med* 2012;366:1404–13.
11. Mega JL, Braunwald E, Wiwott SD, Bassand JP, Bhatt DL, Bode C, et al. Rivaroxaban in patients with a recent acute coronary syndrome. *N Engl J Med* 2012;366:9–19.
12. Lanksy AJ, Goto K, Cristea E, Fahy M, Parise H, Feit F, et al. Clinical and angiographic predictors of short- and long-term ischemic events in acute coronary syndromes: results from the Acute Catheterization and Urgent Intervention Triage strategy (ACUITY) trial. *Circ Cardiovasc Interv* 2010;3:308–16.
13. Eggers KM, Lagerqvist B, Venge P, Wallentin L, Lindahl B. Prognostic value of biomarkers during and after non-ST-segment elevation acute coronary syndrome. *J Am Coll Cardiol* 2009;54:357–64.
14. Graving J, Smedsrud MK, Omland T, Eek C, Skulstad H, Aaberge L, et al. Sensitive troponin assays and N-terminal pro-B-type natriuretic peptide in acute coronary syndrome: prediction of significant coronary lesions and long-term prognosis. *Am Heart J* 2013;165:716–24.
15. Wollert KC, Kempf T, Peter T, Olofsson S, James S, Johnston N, et al. Prognostic value of growth-differentiation factor-15 in patients with non-ST-elevation acute coronary syndrome. *Circulation* 2007;115:962–71.
16. Lindahl B, Venge P, James S. The new high-sensitivity cardiac troponin T assay improves risk assessment in acute coronary syndromes. *Am Heart J* 2010;160:224–9.
17. Bohula May EA, Bonaca MP, Jarolim P, Antman EM, Braunwald E, Giugliano RP, et al. Prognostic performance of a high-sensitivity cardiac troponin I assay in patients with non-ST-elevation acute coronary syndrome. *Clin Chem* 2014;60:158–64.
18. James S, Åkerblom A, Cannon CP, Emanuelsson H, Husted S, Katus H, et al. Comparison of ticagrelor, the first reversible oral P2Y<sub>12</sub> receptor antagonist, with clopidogrel in patients with acute coronary syndromes: rationale, design, and baseline characteristics of the PLATElet inhibition and patient Outcomes (PLATO) trial. *Am Heart J* 2009;157:599–605.
19. Wallentin L, Becker RC, Budaj A, Cannon CP, Emanuelsson H, Held C, et al. Ticagrelor versus clopidogrel in patients with acute coronary syndromes. *N Engl J Med* 2009;361:1045–57.
20. Grønnesby JK, Borgan O. A method for checking regression models in survival analysis based on the risk score. *Lifetime Data Anal* 1996;2:315–28.
21. Pencina MJ, D'Agostino RB, Steyerberg EW. Extensions of net reclassification improvement calculations to measure usefulness of new biomarkers. *Stat Med* 2011;30:11–21.
22. Lindholm D, Varenhorst C, Cannon CP, Harrington RA, Himmelmann A, Maya J, et al. Ticagrelor vs. clopidogrel in patients with non-ST-elevation acute coronary syndrome with or without revascularization: results from the PLATO trial. *Eur Heart J* 2014;35:2083–93.
23. Kotsia A, Brilakis ES, Held C, Cannon C, Steg GP, Meier B, et al. Extent of coronary artery disease and outcomes after ticagrelor administration in patients with an acute coronary syndrome: Insights from the PLATElet inhibition and patient Outcomes (PLATO) trial. *Am Heart J* 2014;168:68–75.e2.
24. Park D-W, Clare RM, Schulte PJ, Pieper KS, Shaw LK, Califf RM, et al. Extent, location, and clinical significance of non-infarct-related coronary artery disease among patients with ST-elevation myocardial infarction. *JAMA* 2014;312:2019–27.
25. Palmerini T, Gènéreux P, Caixeta A, Cristea E, Lanksy A, Mehran R, et al. A new score for risk stratification of patients with acute coronary syndromes undergoing percutaneous coronary intervention: the ACUITY-PCI (Acute Catheterization and Urgent Intervention Triage Strategy-Percutaneous Coronary Intervention) risk score. *JACC Cardiovasc Interv* 2012;5:1108–16.
26. Antman EM, Tanasijevic MJ, Thompson B, Schactman M, McCabe CH, Cannon CP, et al. Cardiac-specific troponin I levels to predict the risk of mortality in patients with acute coronary syndromes. *N Engl J Med* 1996;335:1342–9.
27. Ohman EM, Armstrong PW, Christenson RH, Granger CB, Katus HA, Hamm CW, et al. Cardiac troponin T levels for risk stratification in acute myocardial ischemia. GUSTO IIA Investigators. *N Engl J Med* 1996;335:1333–41.
28. Diderholm E, Andren B, Frostfeldt G, Genberg M, Jernberg T, Lagerqvist B, et al. The prognostic and therapeutic implications of increased troponin T levels and ST depression in unstable coronary artery disease: the FRISC II invasive troponin T electrocardiogram substudy. *Am Heart J* 2002;143:760–7.
29. James S, Lindbäck J, Tilly J, Siegbahn A, Venge P, Armstrong P, et al. Troponin-T and N-terminal pro-B-type natriuretic peptide predict mortality benefit from coronary revascularization in acute coronary syndromes: a GUSTO-IV substudy. *J Am Coll Cardiol* 2006;48:1146–54.
30. Bagai A, Huang Z, Lohnyngina Y, Harrington RA, Armstrong PW, Strony J, et al. Magnitude of troponin elevation and long-term clinical outcomes in acute coronary syndrome patients treated with and without revascularization. *Circ Cardiovasc Interv.* 2015;8:e002314.
31. Jernberg T, Lindahl B, Siegbahn A, Andren B, Frostfeldt G, Lagerqvist B, et al. N-terminal pro-brain natriuretic peptide in relation to inflammation, myocardial necrosis, and the effect of an invasive strategy in unstable coronary artery disease. *J Am Coll Cardiol* 2003;42:1909–16.
32. James S, Lindahl B, Siegbahn A, Stridsberg M, Venge P, Armstrong P, et al. N-terminal pro-brain natriuretic peptide and other risk markers for the separate prediction of mortality and subsequent myocardial infarction in patients with unstable coronary artery disease: a Global Utilization of Strategies To Open occluded arteries (GUSTO)-IV substudy. *Circulation* 2003;108:275–81.
33. Olsson LG, Swedberg K, Cleland JGF, Spark PA, Komajda M, Metra M, et al. Prognostic importance of plasma NT-pro BNP in chronic heart failure in patients treated with a beta-blocker: results from the Carvedilol Or Metoprolol European Trial (COMET) trial. *Eur J Heart Fail* 2007;9:795–801.
34. Hijazi Z, Oldgren J, Andersson U, Connolly SJ, Ezekowitz MD, Hohnloser SH, et al. Cardiac biomarkers are associated with an increased risk of stroke and death in patients with atrial fibrillation: a Randomized Evaluation of Long-term Anticoagulation Therapy (RE-LY) substudy. *Circulation* 2012;125:1605–16.
35. Anand IS, Kempf T, Rector TS, Tapken H, Allhoff T, Jantzen F, et al. Serial measurement of growth-differentiation factor-15 in heart failure: relation to disease severity and prognosis in the Valsartan Heart Failure Trial. *Circulation* 2010;122:1387–95.
36. Wallentin L, Hijazi Z, Andersson U, Alexander JH, De Caterina R, Hanna M, et al. Growth differentiation factor 15, a marker of oxidative stress and inflammation, for risk assessment in patients with atrial fibrillation: insights from the ARISTOTLE trial. *Circulation* 2014;130:1847–58.
37. Wallentin L, Zethelius B, Berglund L, Eggers KM, Lind L, Lindahl B, et al. GDF-15 for prognostication of cardiovascular and cancer morbidity and mortality in men. *PLoS ONE* 2013;8:e78797.
38. Rohatgi A, Patel P, Das SR, Ayers CR, Khera A, Martinez-Rumayor A, et al. Association of growth differentiation factor-15 with coronary atherosclerosis and mortality in a young, multiethnic population: observations from the Dallas Heart Study. *Clin Chem* 2012;58:172–82.
39. Wollert KC, Kempf T, Lagerqvist B, Lindahl B, Olofsson S, Allhoff T, et al. Growth differentiation factor 15 for risk stratification and selection of an invasive treatment strategy in non ST-elevation acute coronary syndrome. *Circulation* 2007;116:1540–8.
40. Widaer C, Pencina MJ, Meisner A, Kempf T, Bethmann K, Marquardt I, et al. Adjustment of the GRACE score by growth differentiation factor 15 enables a more accurate appreciation of risk in non-ST-elevation acute coronary syndrome. *Eur Heart J* 2012;33:1095–104.
